# Supplementary material
Source: PubMed Central journal article supplement (PMC7275092)
Supplement: NIHMS1557487-supplement-Figure_S2.pdf [file NIHMS1557487-supplement-Figure_S2.pdf]

Figure S2. Incidence of HIV during pregnancy and breastfeeding over time

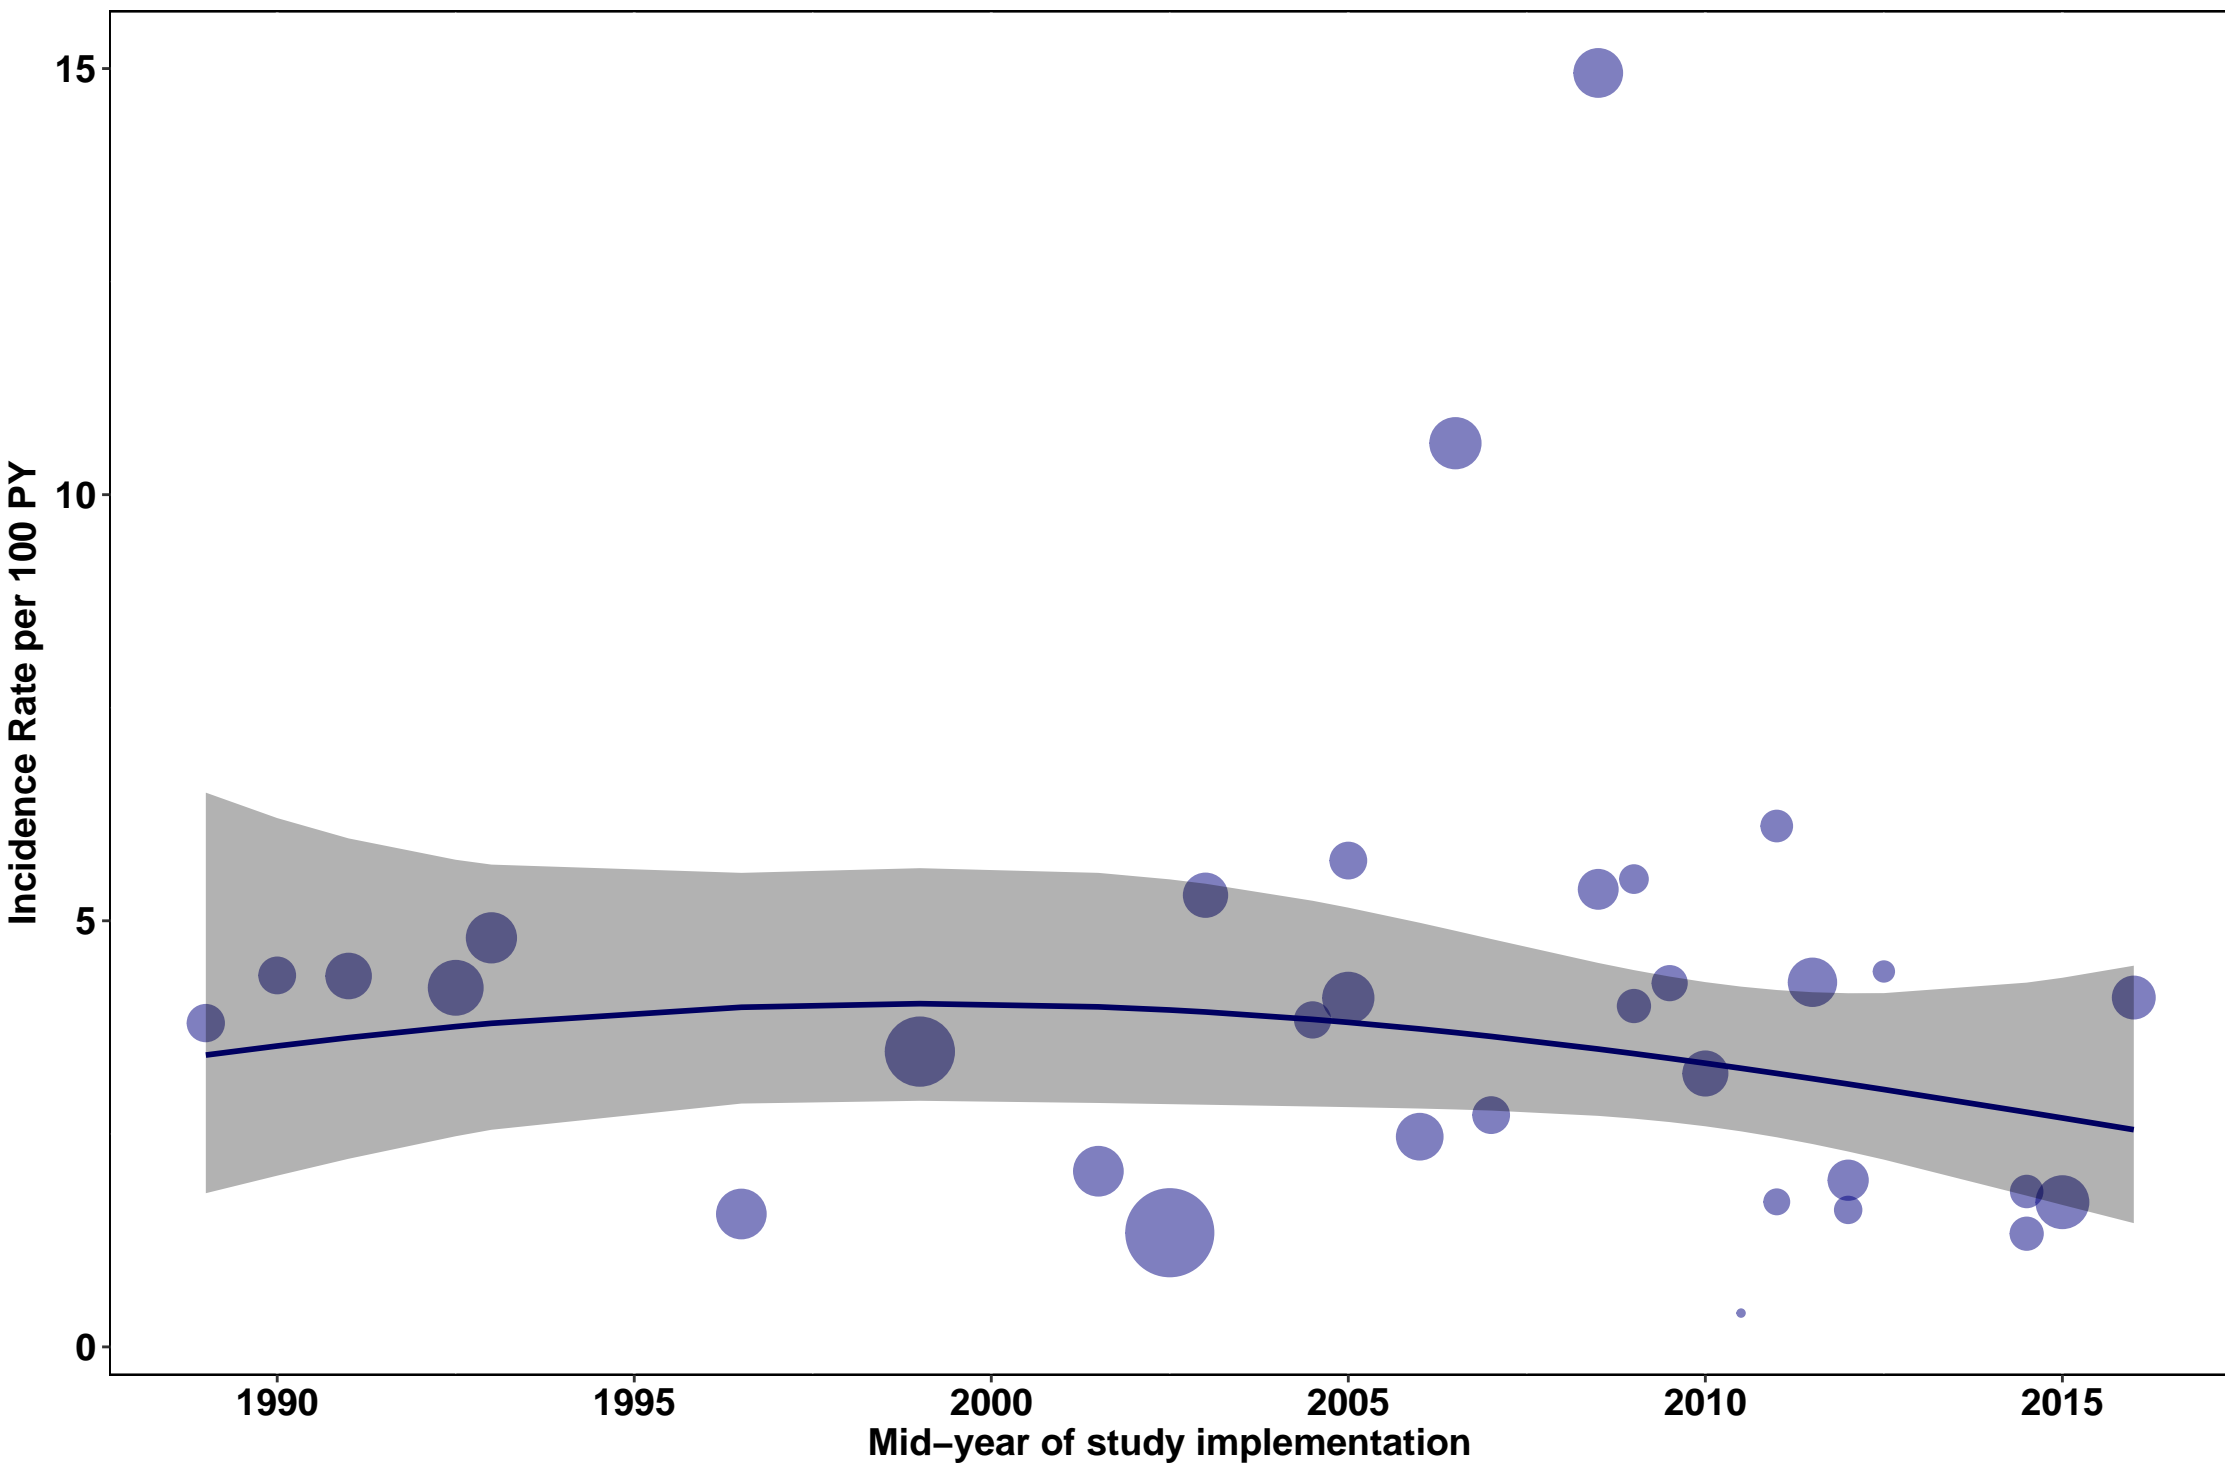

Average HIV incidence rate during pregnancy and breastfeeding is plotted by mid-year of study implementation. The size of the bubble is proportional to the number of PY contributed by each study. The solid line is the predicted average HIV incidence rate from the described meta-regression. The shaded band is the 95% confidence limit around the predicted average HIV incidence rate.
