# Supplementary material
Source: PubMed Central journal article supplement (PMC7275092)
Supplement: NIHMS1557487-supplement-Table_S1.pdf [file NIHMS1557487-supplement-Table_S1.pdf]

**Table S1.** Database search strategy

| <b>PubMed</b> |                                                                                                                                                                                                                                                                                                                                                                                                                                                                                                                                                                                                                                                                                                                                                                                                                                                                                                                                                                                                                                                                                                                        |
|---------------|------------------------------------------------------------------------------------------------------------------------------------------------------------------------------------------------------------------------------------------------------------------------------------------------------------------------------------------------------------------------------------------------------------------------------------------------------------------------------------------------------------------------------------------------------------------------------------------------------------------------------------------------------------------------------------------------------------------------------------------------------------------------------------------------------------------------------------------------------------------------------------------------------------------------------------------------------------------------------------------------------------------------------------------------------------------------------------------------------------------------|
| Number        | Query                                                                                                                                                                                                                                                                                                                                                                                                                                                                                                                                                                                                                                                                                                                                                                                                                                                                                                                                                                                                                                                                                                                  |
| 1             | Pregnancy[mesh:noexp] OR pregnancy[tw] OR pregnant[tw] OR antenatal[tw] OR ante natal[tw] OR prenatal care[mesh] OR prenatal[tw] OR perinatal care[mesh] OR perinatal[tw] OR antepartum[tw] OR ante partum[tw] OR postnatal care[mesh] OR postnatal[tw] OR post natal[tw] OR postpartum period[mesh] OR postpartum[tw] OR post partum[tw] OR puerperium[tw] OR puerperal[tw] OR lactation[tw] OR lactating[tw] OR lactate[tw] OR breastfeed[tw] OR breastfeeding[tw] OR breast feeding[tw] OR gravidity[mesh]                                                                                                                                                                                                                                                                                                                                                                                                                                                                                                                                                                                                          |
| 2             | Africa South of the Sahara[mesh] OR sub-Saharan Africa[tw] OR Subsaharan Africa[tw] OR sub Saharan Africa[tw] OR sub-Sahara[tw] OR Central Africa[tw] OR Southern Africa[tw] OR East Africa[tw] OR Eastern Africa[tw] OR West Africa[tw] OR Western Africa[tw] OR Angola[tw] OR Benin[tw] OR Botswana[tw] OR Burkina Faso[tw] OR Burundi[tw] OR Cameroon[tw] OR Cape Verde[tw] OR Central African Republic[tw] OR Chad[tw] OR Comoros[tw] OR Congo[tw] OR Côte d'Ivoire[tw] OR Ivory Coast[tw] OR Djibouti[tw] OR DRC[tw] OR Eritrea[tw] OR Ethiopia[tw] OR Gabon[tw] OR Gambia[tw] OR Ghana[tw] OR Guinea[tw] OR Kenya[tw] OR Lesotho[tw] OR Liberia[tw] OR Madagascar[tw] OR Malawi[tw] OR Mali[tw] OR Mauritania[tw] OR Mauritius[tw] OR Mayotte[tw] OR Mozambique[tw] OR Mocambique[tw] OR Namibia[tw] OR Niger[tw] OR Nigeria[tw] OR Réunion[tw] OR Rwanda[tw] OR Sahel[tw] OR Sao Tome and Principe[tw] OR Senegal[tw] OR Seychelles[tw] OR Sierra Leone[tw] OR Somalia[tw] OR South Africa[tw] OR RSA[tw] OR Sudan[tw] OR Swaziland[tw] OR Tanzania[tw] OR Togo[tw] OR Uganda[tw] OR Zambia[tw] OR Zimbabwe[tw] |
| 3             | HIV[mesh] OR HIV[tw] OR Human Immunodeficiency Virus[tw] OR Human Immunodeficiency Viruses[tw] OR HIV/AIDS[tw] OR HIV Infections[mesh:noexp] OR HIV infection[tw] OR HIV infections[tw] OR HIV Seropositivity[tw] OR HIV Seropositivities[tw] OR HIV seroconversion[tw]                                                                                                                                                                                                                                                                                                                                                                                                                                                                                                                                                                                                                                                                                                                                                                                                                                                |
| 4             | Protective Factors[mesh] OR protective factor[tw] OR protective factors[tw] OR incidence[tw] OR incident[tw] OR acquisition[tw] OR acquiring[tw] OR acquired[tw] OR acquire[tw] OR acute[tw] OR risk [tw] OR risk factor[tw] OR risk factors[tw]                                                                                                                                                                                                                                                                                                                                                                                                                                                                                                                                                                                                                                                                                                                                                                                                                                                                       |
| 5             | ("1980/01/01"[Date - Publication] : "2018/12/01"[Date - Publication])                                                                                                                                                                                                                                                                                                                                                                                                                                                                                                                                                                                                                                                                                                                                                                                                                                                                                                                                                                                                                                                  |
| 6             | 1 AND 2 AND 3 AND 4 AND 5                                                                                                                                                                                                                                                                                                                                                                                                                                                                                                                                                                                                                                                                                                                                                                                                                                                                                                                                                                                                                                                                                              |
| <b>Embase</b> |                                                                                                                                                                                                                                                                                                                                                                                                                                                                                                                                                                                                                                                                                                                                                                                                                                                                                                                                                                                                                                                                                                                        |
| Number        | Query                                                                                                                                                                                                                                                                                                                                                                                                                                                                                                                                                                                                                                                                                                                                                                                                                                                                                                                                                                                                                                                                                                                  |
| 1             | (‘pregnancy’/de OR ‘prenatal care’/de OR ‘perinatal care’/de OR ‘postnatal care’/de OR ‘puerperium’/de OR ‘lactation’/de (pregnancy OR pregnant OR prenatal OR antenatal OR ‘ante natal’ OR ‘ante-natal’ OR perinatal OR                                                                                                                                                                                                                                                                                                                                                                                                                                                                                                                                                                                                                                                                                                                                                                                                                                                                                               |

|                 |                                                                                                                                                                                                                                                                                                                                                                                                                                                                                                                                                                                                                                                                                                                                                                                                                                                                                                                                                                                                             |
|-----------------|-------------------------------------------------------------------------------------------------------------------------------------------------------------------------------------------------------------------------------------------------------------------------------------------------------------------------------------------------------------------------------------------------------------------------------------------------------------------------------------------------------------------------------------------------------------------------------------------------------------------------------------------------------------------------------------------------------------------------------------------------------------------------------------------------------------------------------------------------------------------------------------------------------------------------------------------------------------------------------------------------------------|
|                 | antepartum OR ‘ante partum’ OR ‘ante-partum’ OR postnatal OR ‘post natal’ OR ‘post-natal’ OR puerperium OR puerperal OR postpartum OR ‘post partum’ OR ‘post-partum’ OR lactation OR lactating OR lactate OR breastfeed OR breastfeeding OR ‘breast feeding’ OR ‘breast-feeding’ OR gravidity):ab,ti)                                                                                                                                                                                                                                                                                                                                                                                                                                                                                                                                                                                                                                                                                                       |
| 2               | (‘Africa south of the Sahara’/exp OR (‘sub-Saharan Africa’ OR ‘Subsaharan Africa’ OR ‘sub Saharan Africa’ OR ‘sub-Sahara’ OR ‘Central Africa’ OR ‘Southern Africa’ OR ‘East Africa’ OR ‘Eastern Africa’ OR ‘West Africa’ OR ‘Western Africa’ OR Angola OR Benin OR Botswana OR ‘Burkina Faso’ OR Burundi OR Cameroon OR ‘Cape Verde’ OR ‘Central African Republic’ OR Chad OR Comoros OR Congo OR ‘Cote d Ivoire’ OR ‘Ivory Coast’ OR Djibouti OR DRC OR Eritrea OR Ethiopia OR Gabon OR Gambia OR Ghana OR Guinea OR Kenya OR Lesotho OR Liberia OR Madagascar OR Malawi OR Mali OR Mauritania OR Mauritius OR Mayotte OR Mozambique OR Mocambique OR Namibia OR Niger OR Nigeria OR Réunion OR Rwanda OR Sahel OR ‘Sao Tome and Principe’ OR Senegal OR Seychelles OR ‘Sierra Leone’ OR Somalia OR ‘South Africa’ OR RSA OR Sudan OR Swaziland OR Tanzania OR Togo OR Uganda OR Zambia OR Zimbabwe):ab,ti)                                                                                                |
| 3               | (‘human immunodeficiency virus infection’/de OR ‘acute HIV infection’/de OR ‘Human immunodeficiency virus 1 infection’/de OR ‘Human immunodeficiency virus 2 infection’/de OR (HIV OR ‘Human Immunodeficiency Virus’ OR ‘Human Immunodeficiency Viruses’ OR ‘HIV infection’ OR ‘HIV infections’ OR ‘hiv seropositivity’ OR ‘HIV seropositivities’ OR ‘hiv seroconversion’ OR ‘HIV/AIDS’ ):ab,ti)                                                                                                                                                                                                                                                                                                                                                                                                                                                                                                                                                                                                            |
| 4               | (‘incidence’/de OR ‘risk factor’/de OR (incidence OR incident OR acquisition OR acquiring OR acquired OR acquire OR acute OR ‘risk factor’ OR ‘risk factors’ OR ‘protective factor’ OR ‘protective factors’ OR ‘risk’):ab,ti)                                                                                                                                                                                                                                                                                                                                                                                                                                                                                                                                                                                                                                                                                                                                                                               |
| 5               | 01/01/1980 to 01/12/2018                                                                                                                                                                                                                                                                                                                                                                                                                                                                                                                                                                                                                                                                                                                                                                                                                                                                                                                                                                                    |
| 6               | #1 AND #2 AND #3 AND #4 AND #5                                                                                                                                                                                                                                                                                                                                                                                                                                                                                                                                                                                                                                                                                                                                                                                                                                                                                                                                                                              |
| 7               | #1 AND #2 AND #3 AND #4 AND #5 AND [embase]/lim                                                                                                                                                                                                                                                                                                                                                                                                                                                                                                                                                                                                                                                                                                                                                                                                                                                                                                                                                             |
| <b>PsycInfo</b> |                                                                                                                                                                                                                                                                                                                                                                                                                                                                                                                                                                                                                                                                                                                                                                                                                                                                                                                                                                                                             |
| Number          | Query                                                                                                                                                                                                                                                                                                                                                                                                                                                                                                                                                                                                                                                                                                                                                                                                                                                                                                                                                                                                       |
| 1               | DE (“pregnancy” OR “prenatal care” OR DE “perinatal period” OR DE “antepartum period” OR DE “postnatal period” OR DE “lactation”) OR TI (“pregnancy” OR “prenatal” OR “pre natal” OR “pre-natal” OR “antenatal” OR “ante natal” OR “perinatal” OR “antepartum” OR “ante partum” OR “ante-partum” OR “postnatal” OR “post natal” OR “post-natal” OR “postpartum” OR “post partum” OR “post-partum” OR “puerperium” OR “puerperal” OR “lactation” OR “lactating” OR “lactate” OR “breastfeed” OR “breastfeeding” OR “breast feeding” OR “breast-feeding” OR “gravidity”) OR AB (“pregnancy” OR “prenatal” OR “pre natal” OR “pre-natal” OR “antenatal” OR “ante natal” OR “perinatal” OR “antepartum” OR “ante partum” OR “ante-partum” OR “postnatal” OR “post natal” OR “post-natal” OR “postpartum” OR “post partum” OR “post-partum” OR “puerperium” OR “puerperal” OR “lactation” OR “lactating” OR “lactate” OR “breastfeed” OR “breastfeeding” OR “breast feeding” OR “breast-feeding” OR “gravidity”) |

|                         |                                                                                                                                                                                                                                                                                                                                                                                                                                                                                                                                                                                                                                                                                                                                                                                                                                                                                                                                                                                                                                                                                                                                                                                                                                                                                                                                                                                                                                                                                                                                                                                                                                                                                                                                                                                                                                                                                                                            |
|-------------------------|----------------------------------------------------------------------------------------------------------------------------------------------------------------------------------------------------------------------------------------------------------------------------------------------------------------------------------------------------------------------------------------------------------------------------------------------------------------------------------------------------------------------------------------------------------------------------------------------------------------------------------------------------------------------------------------------------------------------------------------------------------------------------------------------------------------------------------------------------------------------------------------------------------------------------------------------------------------------------------------------------------------------------------------------------------------------------------------------------------------------------------------------------------------------------------------------------------------------------------------------------------------------------------------------------------------------------------------------------------------------------------------------------------------------------------------------------------------------------------------------------------------------------------------------------------------------------------------------------------------------------------------------------------------------------------------------------------------------------------------------------------------------------------------------------------------------------------------------------------------------------------------------------------------------------|
| 2                       | TI (“sub-Saharan Africa” OR “Subsaharan Africa” OR “sub Saharan Africa” OR “sub-Sahara” OR “Central Africa” OR “Southern Africa” OR “East Africa” OR “Eastern Africa” OR “West Africa” OR “Western Africa” OR “Angola” OR “Benin” OR “Botswana” OR “Burkina Faso” OR “Burundi” OR “Cameroon” OR “Cape Verde” OR “Central African Republic” OR “Chad” OR “Comoros” OR “Congo” OR “Cote d Ivoire” OR “Ivory Coast” OR “Djibouti” OR “DRC” OR “Eritrea” OR “Ethiopia” OR “Gabon” OR “Gambia” OR “Ghana” OR “Guinea” OR “Kenya” OR “Lesotho” OR “Liberia” OR “Madagascar” OR “Malawi” OR “Mali” OR “Mauritania” OR “Mauritius” OR “Mayotte” OR “Mozambique” OR “Mocambique” OR “Namibia” OR “Niger” OR “Nigeria” OR “Réunion” OR “Rwanda” OR “Sahel” OR “Sao Tome and Principe” OR “Senegal” OR “Seychelles” OR “Sierra Leone” OR “Somalia” OR “South Africa” OR “RSA” OR “Sudan” OR “Swaziland” OR “Tanzania” OR “Togo” OR “Uganda” OR “Zambia” OR “Zimbabwe”) OR AB (“sub-Saharan Africa” OR “Subsaharan Africa” OR “sub Saharan Africa” OR “sub-Sahara” OR “Central Africa” OR “Southern Africa” OR “East Africa” OR “Eastern Africa” OR “West Africa” OR “Western Africa” OR “Angola” OR “Benin” OR “Botswana” OR “Burkina Faso” OR “Burundi” OR “Cameroon” OR “Cape Verde” OR “Central African Republic” OR “Chad” OR “Comoros” OR “Congo” OR “Cote d Ivoire” OR “Ivory Coast” OR “Djibouti” OR “DRC” OR “Eritrea” OR “Ethiopia” OR “Gabon” OR “Gambia” OR “Ghana” OR “Guinea” OR “Kenya” OR “Lesotho” OR “Liberia” OR “Madagascar” OR “Malawi” OR “Mali” OR “Mauritania” OR “Mauritius” OR “Mayotte” OR “Mozambique” OR “Mocambique” OR “Namibia” OR “Niger” OR “Nigeria” OR “Réunion” OR “Rwanda” OR “Sahel” OR “Sao Tome and Principe” OR “Senegal” OR “Seychelles” OR “Sierra Leone” OR “Somalia” OR “South Africa” OR “RSA” OR “Sudan” OR “Swaziland” OR “Tanzania” OR “Togo” OR “Uganda” OR “Zambia” OR “Zimbabwe”) |
| 3                       | DE (“HIV”) OR TI (“HIV” OR “human immunodeficiency virus” OR “human immunodeficiency viruses” OR “HIV infection” OR “HIV infections” OR “HIV seropositivity” OR “HIV Seropositivities” OR “HIV/AIDS”) OR AB (“HIV” OR “human immunodeficiency virus” OR “human immunodeficiency viruses” OR “HIV infection” OR “HIV infections” OR “HIV seropositivity” OR “HIV Seropositivities” OR “HIV seroconversion” OR “HIV/AIDS”)                                                                                                                                                                                                                                                                                                                                                                                                                                                                                                                                                                                                                                                                                                                                                                                                                                                                                                                                                                                                                                                                                                                                                                                                                                                                                                                                                                                                                                                                                                   |
| 4                       | DE (“risk factors” OR “protective factors”) OR TI (“incidence” OR “incident” OR “acquisition” OR “acquiring” OR “acquired” OR “acute” OR “risk factor” OR “risk factors” OR “protective factor” OR “protective factors” OR “risk”) OR AB (“incidence” OR “incident” OR “acquisition” OR “acquiring” OR “acquired” OR “acute” OR “risk factor” OR “risk factors” OR “protective factor” OR “protective factors” OR “risk”)                                                                                                                                                                                                                                                                                                                                                                                                                                                                                                                                                                                                                                                                                                                                                                                                                                                                                                                                                                                                                                                                                                                                                                                                                                                                                                                                                                                                                                                                                                  |
| 5                       | (DT 19801001-20181201)                                                                                                                                                                                                                                                                                                                                                                                                                                                                                                                                                                                                                                                                                                                                                                                                                                                                                                                                                                                                                                                                                                                                                                                                                                                                                                                                                                                                                                                                                                                                                                                                                                                                                                                                                                                                                                                                                                     |
| 6                       | S1 AND S2 AND S3 AND S4 AND S5                                                                                                                                                                                                                                                                                                                                                                                                                                                                                                                                                                                                                                                                                                                                                                                                                                                                                                                                                                                                                                                                                                                                                                                                                                                                                                                                                                                                                                                                                                                                                                                                                                                                                                                                                                                                                                                                                             |
| <b>Cochrane Library</b> |                                                                                                                                                                                                                                                                                                                                                                                                                                                                                                                                                                                                                                                                                                                                                                                                                                                                                                                                                                                                                                                                                                                                                                                                                                                                                                                                                                                                                                                                                                                                                                                                                                                                                                                                                                                                                                                                                                                            |
| Number                  | Query                                                                                                                                                                                                                                                                                                                                                                                                                                                                                                                                                                                                                                                                                                                                                                                                                                                                                                                                                                                                                                                                                                                                                                                                                                                                                                                                                                                                                                                                                                                                                                                                                                                                                                                                                                                                                                                                                                                      |
| 1                       | MeSH descriptor: [Pregnancy] this term only                                                                                                                                                                                                                                                                                                                                                                                                                                                                                                                                                                                                                                                                                                                                                                                                                                                                                                                                                                                                                                                                                                                                                                                                                                                                                                                                                                                                                                                                                                                                                                                                                                                                                                                                                                                                                                                                                |
| 2                       | MeSH descriptor: [Prenatal Care] this term only                                                                                                                                                                                                                                                                                                                                                                                                                                                                                                                                                                                                                                                                                                                                                                                                                                                                                                                                                                                                                                                                                                                                                                                                                                                                                                                                                                                                                                                                                                                                                                                                                                                                                                                                                                                                                                                                            |
| 3                       | MeSH descriptor: [Perinatal Care] 1 tree(s) exploded                                                                                                                                                                                                                                                                                                                                                                                                                                                                                                                                                                                                                                                                                                                                                                                                                                                                                                                                                                                                                                                                                                                                                                                                                                                                                                                                                                                                                                                                                                                                                                                                                                                                                                                                                                                                                                                                       |

|    |                                                                                                                                                                                                                                                                                                                                                                                                                                                                                                                                                                                                                                                                                                                                                                                                                                                                                                                                                                                                      |
|----|------------------------------------------------------------------------------------------------------------------------------------------------------------------------------------------------------------------------------------------------------------------------------------------------------------------------------------------------------------------------------------------------------------------------------------------------------------------------------------------------------------------------------------------------------------------------------------------------------------------------------------------------------------------------------------------------------------------------------------------------------------------------------------------------------------------------------------------------------------------------------------------------------------------------------------------------------------------------------------------------------|
| 4  | MeSH descriptor: [Postnatal Care] 2 tree(s) exploded                                                                                                                                                                                                                                                                                                                                                                                                                                                                                                                                                                                                                                                                                                                                                                                                                                                                                                                                                 |
| 5  | MeSH descriptor: [Postpartum Period] explode all trees                                                                                                                                                                                                                                                                                                                                                                                                                                                                                                                                                                                                                                                                                                                                                                                                                                                                                                                                               |
| 6  | MeSH descriptor: [Lactation] this term only                                                                                                                                                                                                                                                                                                                                                                                                                                                                                                                                                                                                                                                                                                                                                                                                                                                                                                                                                          |
| 7  | MeSH descriptor: [Gravidity] explode all trees                                                                                                                                                                                                                                                                                                                                                                                                                                                                                                                                                                                                                                                                                                                                                                                                                                                                                                                                                       |
| 8  | “pregnancy” OR “prenatal” OR “pre natal” OR “pre-natal” OR “antenatal” OR “ante natal” OR “perinatal” OR “antepartum” OR “ante partum” OR “ante-partum” OR “postnatal” OR “post natal” OR “post-natal” OR “postpartum” OR “post partum” OR “post-partum” OR “puerperium” OR “puerperal” OR “lactation” OR “lactating” OR “lactate” OR “breastfeed” OR “breastfeeding” OR “breast feeding” OR “breast-feeding” OR “gravidity”:ti,ab,kw (Word variations have been searched)                                                                                                                                                                                                                                                                                                                                                                                                                                                                                                                           |
| 9  | #1 OR #2 OR #3 OR #4 OR #5 OR #6 OR #7 OR #8                                                                                                                                                                                                                                                                                                                                                                                                                                                                                                                                                                                                                                                                                                                                                                                                                                                                                                                                                         |
| 10 | MeSH descriptor: [Africa South of the Sahara] explode all trees                                                                                                                                                                                                                                                                                                                                                                                                                                                                                                                                                                                                                                                                                                                                                                                                                                                                                                                                      |
| 11 | “sub-Saharan Africa” OR “Subsaharan Africa” OR “sub Saharan Africa” OR “sub-Sahara” OR “Central Africa” OR “Southern Africa” OR “East Africa” OR “Eastern Africa” OR “West Africa” OR “Western Africa” OR “Angola” OR “Benin” OR “Botswana” OR “Burkina Faso” OR “Burundi” OR “Cameroon” OR “Cape Verde” OR “Central African Republic” OR “Chad” OR “Comoros” OR “Congo” OR “Cote d Ivoire” OR “Ivory Coast” OR “Djibouti” OR “DRC” OR “Eritrea” OR “Ethiopia” OR “Gabon” OR “Gambia” OR “Ghana” OR “Guinea” OR “Kenya” OR “Lesotho” OR “Liberia” OR “Madagascar” OR “Malawi” OR “Mali” OR “Mauritania” OR “Mauritius” OR “Mayotte” OR “Mozambique” OR “Mocambique” OR “Namibia” OR “Niger” OR “Nigeria” OR “Réunion” OR “Rwanda” OR “Sahel” OR “Sao Tome and Principe” OR “Senegal” OR “Seychelles” OR “Sierra Leone” OR “Somalia” OR “South Africa” OR “RSA” OR “Sudan” OR “Swaziland” OR “Tanzania” OR “Togo” OR “Uganda” OR “Zambia” OR “Zimbabwe”:ti,ab,kw (Word variations have been searched) |
| 12 | #10 OR #11                                                                                                                                                                                                                                                                                                                                                                                                                                                                                                                                                                                                                                                                                                                                                                                                                                                                                                                                                                                           |
| 13 | MeSH descriptor: [HIV] this term only                                                                                                                                                                                                                                                                                                                                                                                                                                                                                                                                                                                                                                                                                                                                                                                                                                                                                                                                                                |
| 14 | MeSH descriptor: [HIV Infections] this term only                                                                                                                                                                                                                                                                                                                                                                                                                                                                                                                                                                                                                                                                                                                                                                                                                                                                                                                                                     |
| 15 | “HIV” OR “human immunodeficiency virus” OR “human immunodeficiency viruses” OR “HIV infection” OR “HIV infections” OR “HIV seropositivity” OR “HIV Seropositivities” OR “HIV seroconversion” OR “HIV/AIDS”:ti,ab,kw (Word variations have been searched)                                                                                                                                                                                                                                                                                                                                                                                                                                                                                                                                                                                                                                                                                                                                             |
| 16 | #13 OR #14 OR #15                                                                                                                                                                                                                                                                                                                                                                                                                                                                                                                                                                                                                                                                                                                                                                                                                                                                                                                                                                                    |
| 17 | MeSH descriptor: [Risk Factors] explode all trees                                                                                                                                                                                                                                                                                                                                                                                                                                                                                                                                                                                                                                                                                                                                                                                                                                                                                                                                                    |
| 18 | MeSH descriptor: [incidence] this term only                                                                                                                                                                                                                                                                                                                                                                                                                                                                                                                                                                                                                                                                                                                                                                                                                                                                                                                                                          |
| 19 | “incidence” OR “incident” OR “acquisition” OR “acquiring” OR “acquired” OR “acute” OR “risk factor” OR “risk factors” OR “protective factor” OR “protective factors” OR “risk”:ti,ab,kw (Word variations have been searched)                                                                                                                                                                                                                                                                                                                                                                                                                                                                                                                                                                                                                                                                                                                                                                         |
| 20 | #17 OR #18 OR #19                                                                                                                                                                                                                                                                                                                                                                                                                                                                                                                                                                                                                                                                                                                                                                                                                                                                                                                                                                                    |
