# Supplementary material
Source: PubMed Central journal article supplement (PMC7275092)
Supplement: NIHMS1557487-supplement-Table_S3.pdf [file NIHMS1557487-supplement-Table_S3.pdf]

**Table S3.** Sensitivity analysis of age-group definitions used in stratified analyses and meta-regression of the HIV incidence rate during pregnancy and breastfeeding

| Variable                       | Stratum Specific Estimates |                       |             | Univariate Meta-Regression         |            |         | Multivariate Meta-Regression* |                                    |            |         |                 |
|--------------------------------|----------------------------|-----------------------|-------------|------------------------------------|------------|---------|-------------------------------|------------------------------------|------------|---------|-----------------|
|                                | Number of Estimates        | Pooled incidence rate | (95% PI)    | Ratio of the pooled incidence rate | (95% CI)   | P-value | Omnibus p-value               | Ratio of the pooled incidence rate | (95% CI)   | P-value | Omnibus p-value |
| <b>Selected age group</b>      |                            |                       |             |                                    |            |         |                               |                                    |            |         |                 |
| < 20 years                     | 7                          | 3.8                   | (1.5, 10.1) | 1.0                                | -          | 0.7     | -                             | 1.0                                | -          | -       | -               |
| 20-24 years                    | 6                          | 2.8                   | (1.1, 7.4)  | 0.7                                | (0.6, 1.0) | 0.6     | -                             | 0.7                                | (0.5, 1.0) | 0.05    | -               |
| 25-29 years                    | 5                          | 2.5                   | (0.9, 6.6)  | 0.6                                | (0.5, 0.9) | 0.5     | -                             | 0.6                                | (0.4, 0.9) | 0.01    | -               |
| ≥ 30 years                     | 6                          | 1.8                   | (0.7, 4.8)  | 0.5                                | (0.3, 0.7) | <0.001  | <0.001                        | 0.5                                | (0.3, 0.7) | <0.001  | <0.001          |
| <b>Alternative age group 1</b> |                            |                       |             |                                    |            |         |                               |                                    |            |         |                 |
| < 20 years                     | 7                          | 3.8                   | (1.4, 10.1) | 1.0                                | -          | -       | -                             | 1.0                                | -          | -       | -               |
| 20-29 years                    | 7                          | 2.7                   | (1.0, 6.9)  | 0.7                                | (0.5, 0.9) | 0.005   | -                             | 0.7                                | (0.5, 0.9) | 0.005   | -               |
| ≥ 30 years                     | 6                          | 1.8                   | (0.7, 4.9)  | 0.5                                | (0.3, 0.7) | <0.001  | <0.001                        | 0.5                                | (0.3, 0.7) | <0.001  | <0.001          |
| <b>Alternative age group 2</b> |                            |                       |             |                                    |            |         |                               |                                    |            |         |                 |
| ≤ 24 years                     | 8                          | 3.4                   | (1.3, 9.1)  | 1.0                                | -          | -       | -                             | 1.0                                | -          | -       | -               |
| > 24 years                     | 8                          | 2.0                   | (0.7, 5.4)  | 0.6                                | (0.4, 0.8) | 0.001   | 0.001                         | 0.6                                | (0.4, 0.8) | <0.001  | <0.001          |

\* Models were adjusted for region, length of study implementation, and calendar time.
