# Supplementary material
Source: PubMed Central journal article supplement (PMC7275092)
Supplement: NIHMS1557487-supplement-Table_S4.pdf [file NIHMS1557487-supplement-Table_S4.pdf]

**Table S4.** Sensitivity analysis of the definition of ‘high-risk’ cohort used in stratified analyses and meta-regression of the HIV incidence rate during pregnancy and breastfeeding

| Variable                                                                                 | Stratum Specific Estimates |                       |             | Univariate Meta-Regression         |            |         |                 | Multivariate Meta-Regression*      |             |         |                 |
|------------------------------------------------------------------------------------------|----------------------------|-----------------------|-------------|------------------------------------|------------|---------|-----------------|------------------------------------|-------------|---------|-----------------|
|                                                                                          | Number of Estimates        | Pooled incidence rate | (95% PI)    | Ratio of the pooled incidence rate | (95% CI)   | P-value | Omnibus p-value | Ratio of the pooled incidence rate | (95% CI)    | P-value | Omnibus p-value |
| <b>Study population comprised primarily of women in HIV-serodiscordant relationships</b> |                            |                       |             |                                    |            |         |                 |                                    |             |         |                 |
| No                                                                                       | 33                         | 3.5                   | (1.4, 10.6) | 1.0                                | -          | -       | -               | 1.0                                | -           | -       | -               |
| Yes                                                                                      | 2                          | 7.4                   | (1.9, 29.2) | 2.1                                | (0.9, 5.0) | 0.09    | 0.09            | 4.7                                | (2.2, 10.2) | <0.001  | <0.001          |
| <b>Study population comprised primarily of female sex workers</b>                        |                            |                       |             |                                    |            |         |                 |                                    |             |         |                 |
| No                                                                                       | 33                         | 3.7                   | (1.2, 11.7) | 1.0                                | -          | -       | -               | 1.0                                | -           | -       | -               |
| Yes                                                                                      | 2                          | 2.2                   | (0.5, 9.7)  | 0.6                                | (0.2, 1.6) | 0.3     | 0.3             | 0.6                                | (0.2, 1.8)  | 0.3     | 0.3             |

\* Models were adjusted for region, length of study implementation, and calendar time.
