# Supplementary material
Source: PubMed Central journal article supplement (PMC7275092)
Supplement: NIHMS1557487-supplement-Table_S6.pdf [file NIHMS1557487-supplement-Table_S6.pdf]

**Table S6.** Stratified analysis and meta-regression of the association between pregnancy and risk of HIV acquisition without estimates from Teasdale *et al.* (2018)

| Variable                                                                           | Stratum Specific Estimates |           |            | Univariate Meta-Regression Results |            |         |                 |
|------------------------------------------------------------------------------------|----------------------------|-----------|------------|------------------------------------|------------|---------|-----------------|
|                                                                                    | Number of Estimates        | Pooled HR | (95% PI)   | Ratio of the pooled HR             | (95% CI)   | P-value | Omnibus p-value |
| <b>Region of Africa</b>                                                            |                            |           |            |                                    |            |         |                 |
| Southern Africa                                                                    | 3                          | 0.9       | (0.1, 5.2) | 1.0                                | -          | -       | -               |
| Eastern Africa                                                                     | 3                          | 0.9       | (0.1, 5.5) | 1.0                                | (0.2, 4.2) | 0.9     | -               |
| Southeastern Africa                                                                | 3                          | 0.9       | (0.2, 5.3) | 1.1                                | (0.3, 4.0) | 0.9     | 1.0             |
| <b>High risk cohort</b>                                                            |                            |           |            |                                    |            |         |                 |
| No                                                                                 | 6                          | 1.0       | (0.2, 4.1) | 1.0                                | -          | -       | -               |
| Yes                                                                                | 3                          | 0.8       | (0.1, 4.2) | 0.8                                | (0.3, 2.7) | 0.8     | 0.8             |
| <b>Participants enrolled in an HIV-prevention clinical trial</b>                   |                            |           |            |                                    |            |         |                 |
| No                                                                                 | 6                          | 0.7       | (0.2, 2.5) | 1.0                                | -          | -       | -               |
| Yes                                                                                | 3                          | 1.5       | (0.4, 5.6) | 2.0                                | (0.8, 5.1) | 0.1     | 0.1             |
| <b>Study design</b>                                                                |                            |           |            |                                    |            |         |                 |
| Prospective cohort                                                                 | 7                          | 1.1       | (0.3, 3.8) | 1.0                                | -          | -       | -               |
| Surveillance study                                                                 | 2                          | 0.6       | (0.3, 2.2) | 0.5                                | (0.2, 1.5) | 0.2     | 0.2             |
| <b>Use of HIV RNA/DNA PCR in HIV testing algorithm</b>                             |                            |           |            |                                    |            |         |                 |
| No                                                                                 | 4                          | 1.3       | (0.3, 5.4) | 1.0                                | -          | -       | -               |
| Yes                                                                                | 3                          | 0.9       | (0.2, 4.0) | 0.7                                | (0.2, 2.2) | 0.6     | 0.6             |
| Undefined                                                                          | 2                          | -         | -          | -                                  | -          | -       | -               |
| <b>Estimated timing of HIV seroconversion</b>                                      |                            |           |            |                                    |            |         |                 |
| Date between last negative and first positive HIV test                             | 5                          | 0.9       | (0.2, 3.7) | 1.0                                | -          | -       | -               |
| Date of the first positive HIV test                                                | 2                          | 1.1       | (0.2, 5.3) | 1.2                                | (0.4, 3.8) | 0.7     | 0.7             |
| Undefined                                                                          | 2                          | -         | -          | -                                  | -          | -       | -               |
| <b>Referent group</b>                                                              |                            |           |            |                                    |            |         |                 |
| Not Pregnant                                                                       | 6                          | 0.8       | (0.2, 3.8) | 1.0                                | -          | -       | -               |
| Not Pregnant or Breastfeeding                                                      | 3                          | 1.0       | (0.2, 4.9) | 1.2                                | (0.4, 3.5) | 0.7     | 0.7             |
| <b>Adjustment for confounders</b>                                                  |                            |           |            |                                    |            |         |                 |
| Yes                                                                                | 7                          | 0.8       | (0.2, 3.3) | 1.0                                | -          | -       | -               |
| No                                                                                 | 2                          | 1.3       | (0.3, 6.5) | 1.6                                | (0.5, 5.0) | 0.4     | 0.4             |
| <b>Adjusted for time-varying measures of condom use and intercourse frequency*</b> |                            |           |            |                                    |            |         |                 |
| No                                                                                 | 5                          | 0.7       | (0.2, 3.2) | 1.0                                | -          | -       | -               |
| Yes                                                                                | 2                          | 1.1       | (0.2, 6.2) | 1.5                                | (0.4, 5.6) | 0.5     | 0.5             |

\* Only among studies that used adjusted models.
